# Supplementary material for: Controlled nanostructuring of CuPc thin films via glancing angle deposition for idealized organic photovoltaic architectures
Source: Royal Society of Chemistry journal article supplement (doi:10.1039/c0jm03026k), 2010-11-12

## Supplementary Data

### 1. Images of seeding arrays

#### 1.1 Seeds from electron beam lithography method (scale bar = 250 nm)

The CuPc material was removed from the seeds in order to acquire this image. Some residue remains, but the periodicity of the seeds is evident.

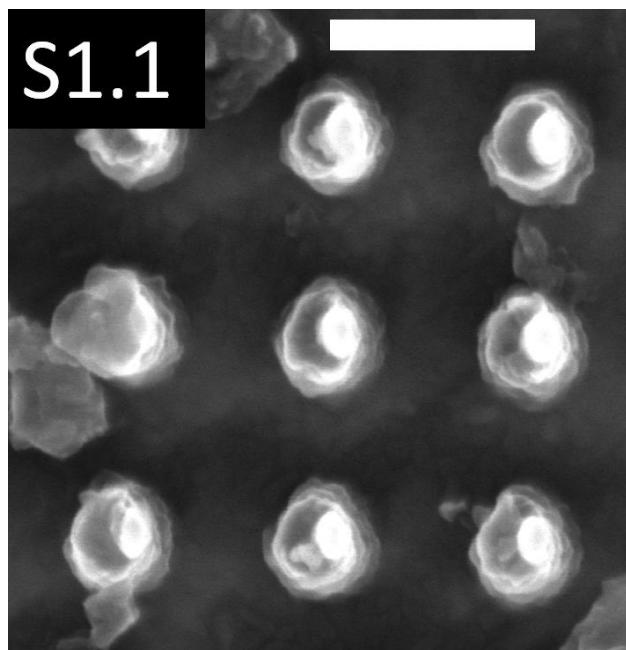

#### 1.2 Seeds from block copolymer method (scale bar = 250 nm)

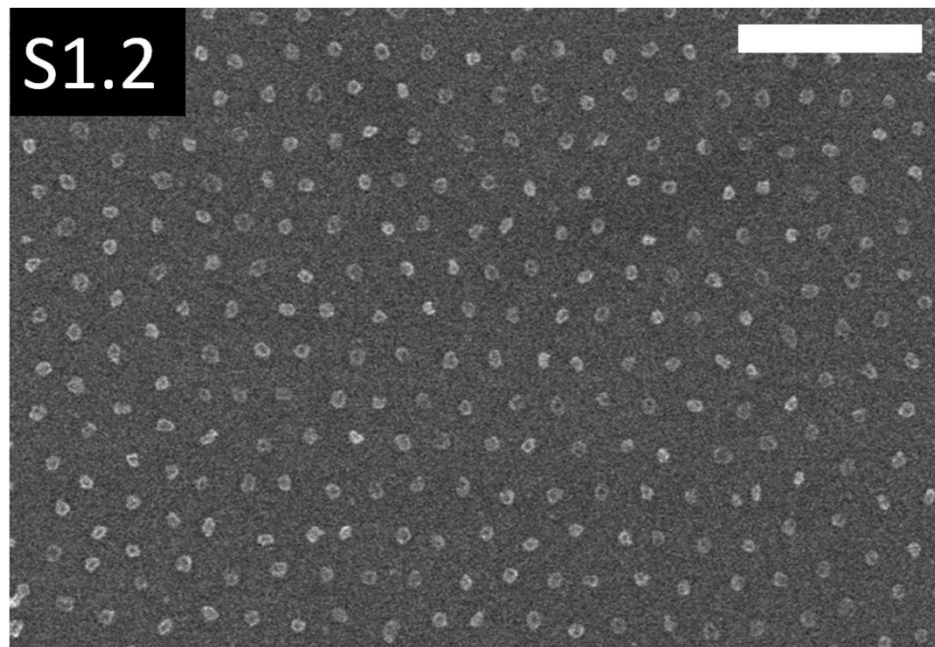

## 2. Images used for column density calculation

### 2.1 *CuPc* on bare *Si* substrate, $\alpha = 85^\circ$

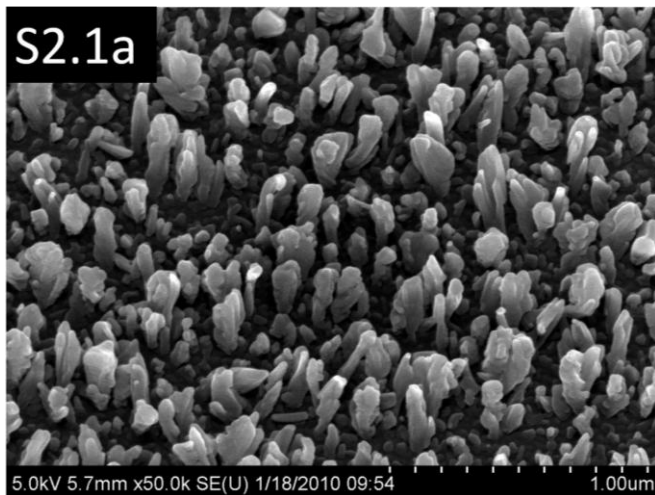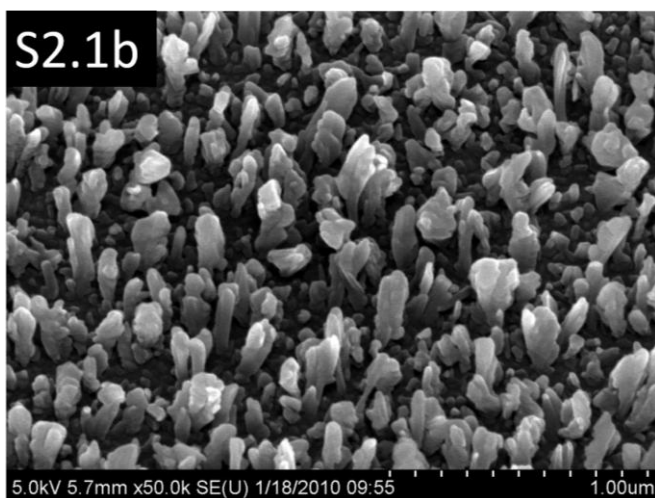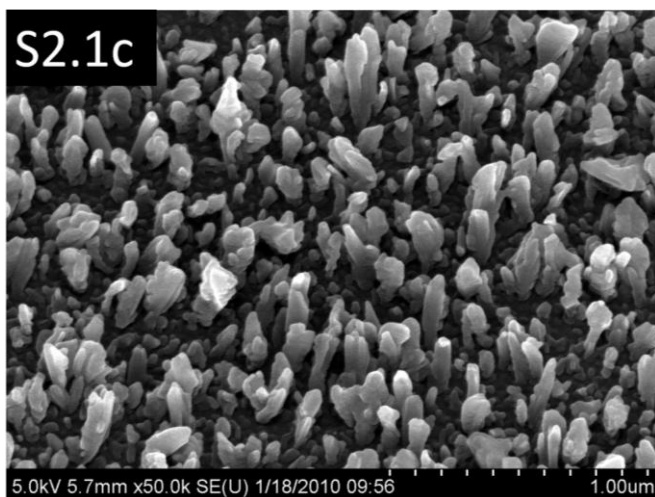

2.2 CuPc on block copolymer seeded Si substrate,  $\alpha = 85^\circ$

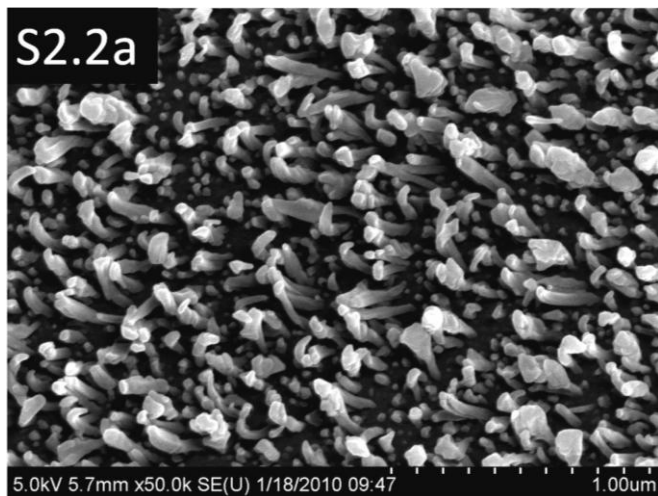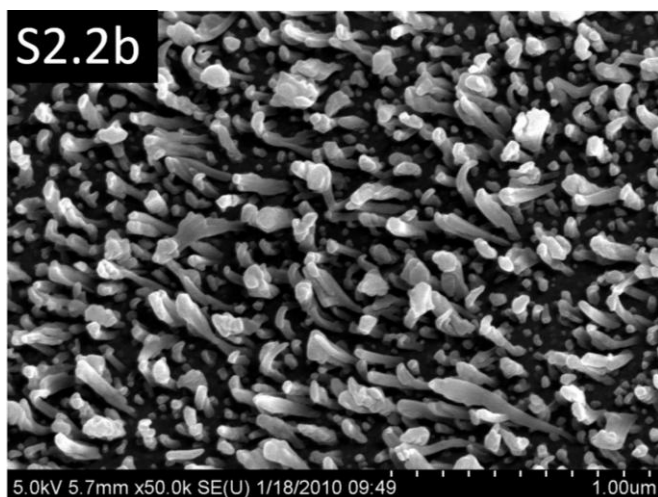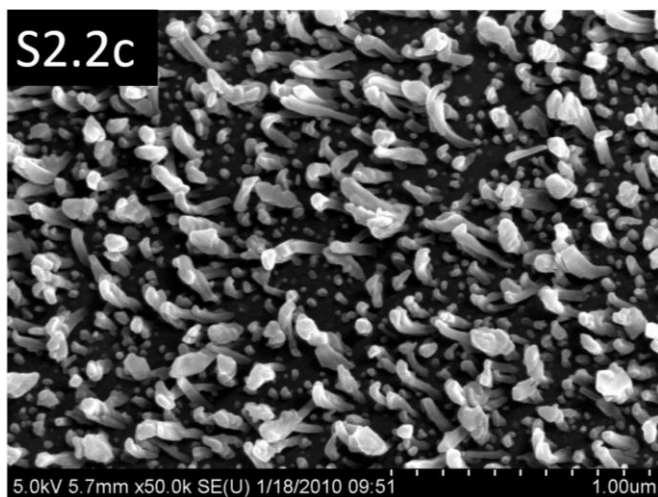

2.3 *CuPc* on bare *Si* substrate,  $\alpha = 80^\circ$

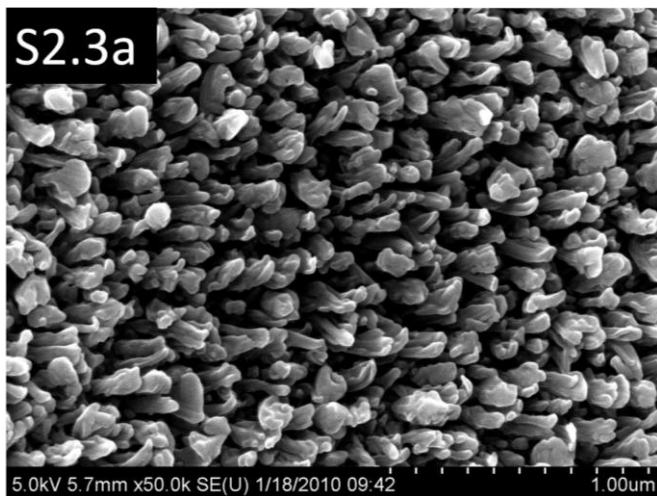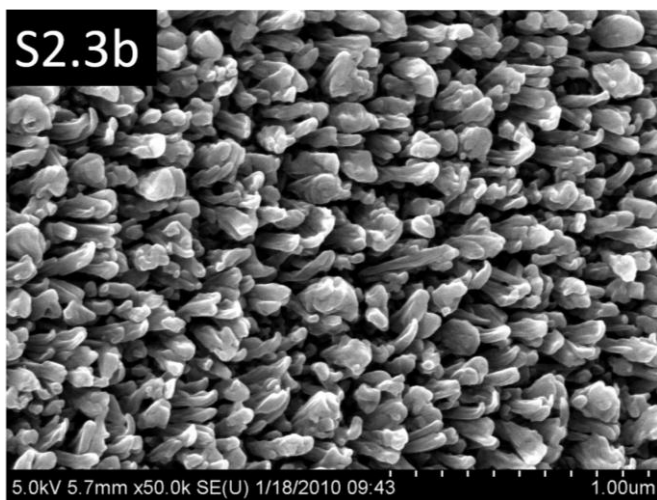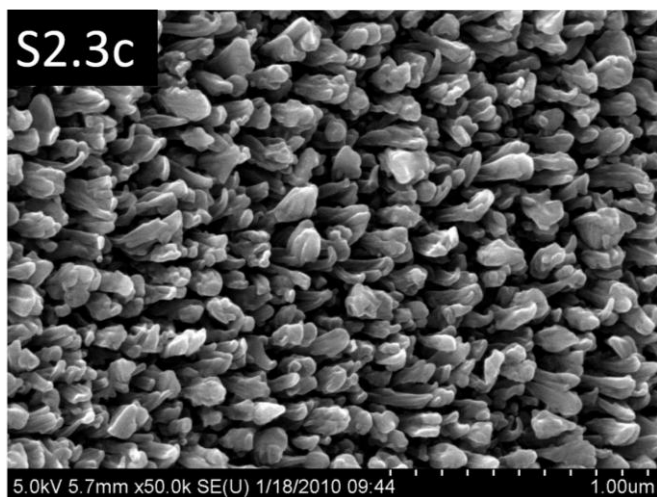

2.4 CuPc on block copolymer seeded Si substrate,  $\alpha = 80^\circ$

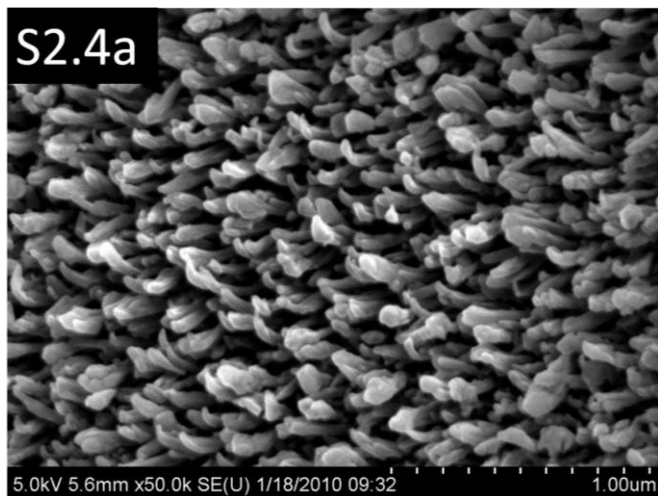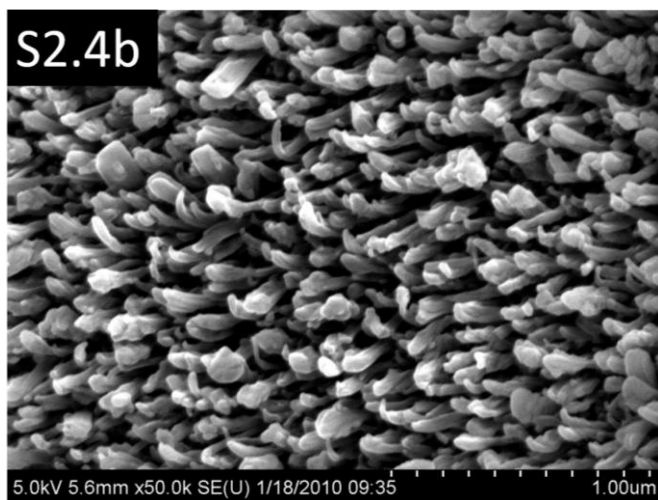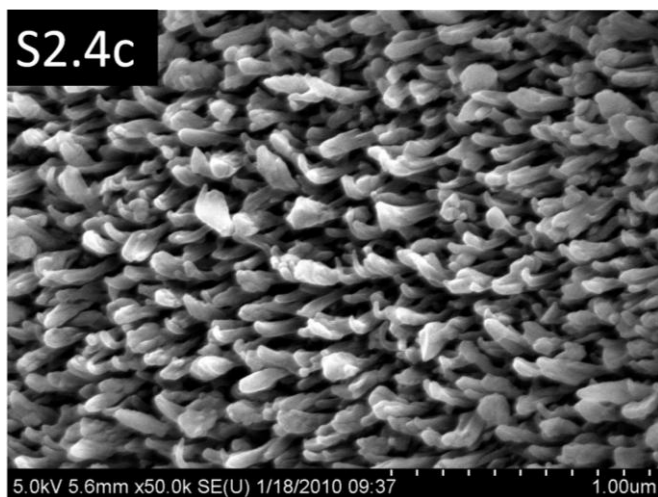

2.5 ZnPc on bare Si substrate,  $\alpha = 80^\circ$

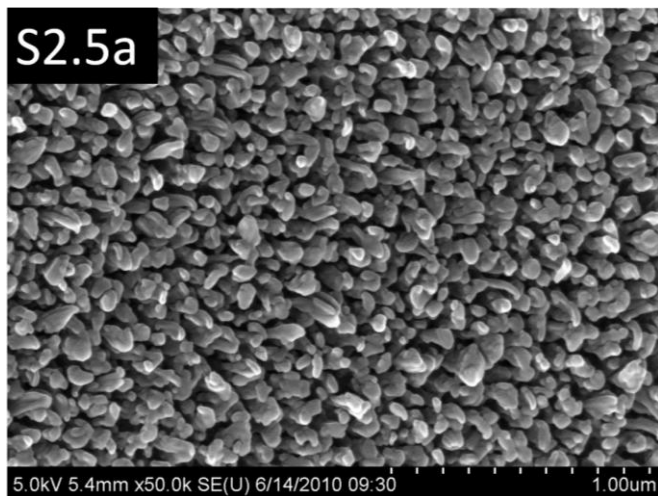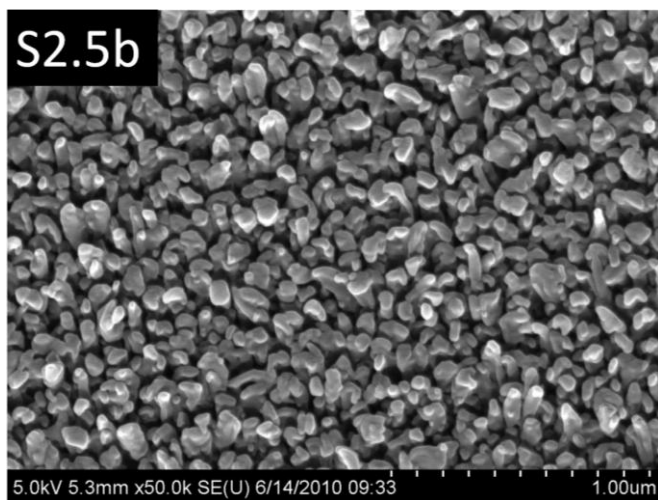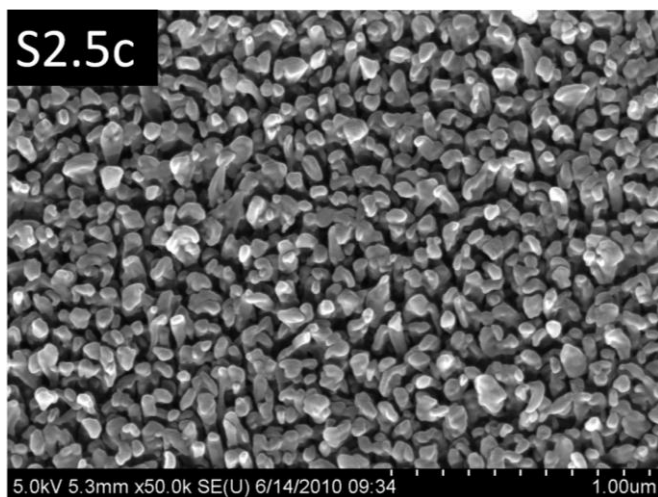

2.6 ZnPc on block copolymer seeded Si substrate,  $\alpha = 80^\circ$

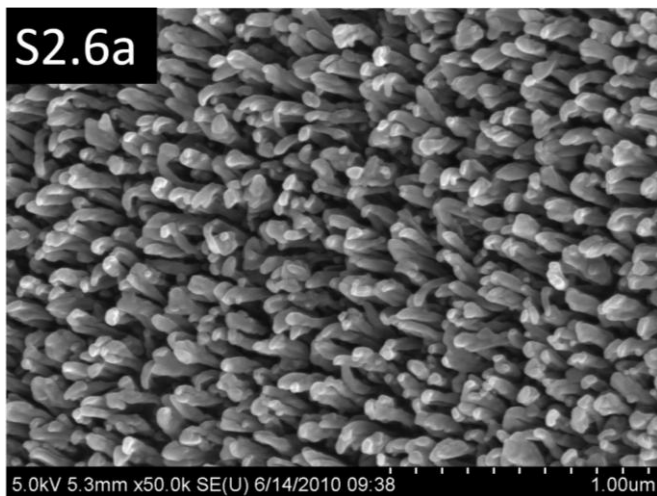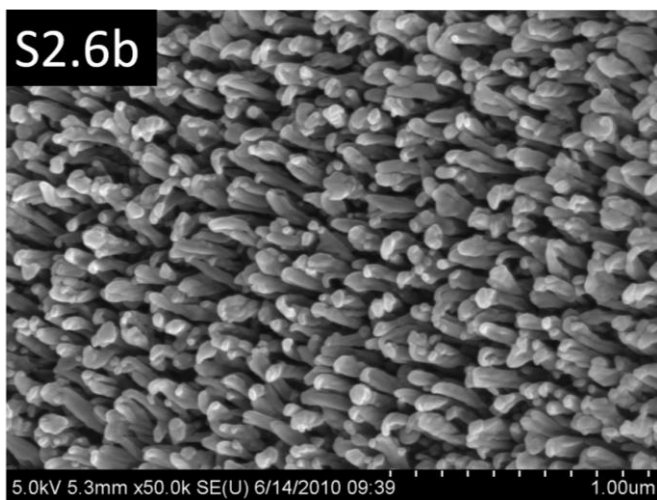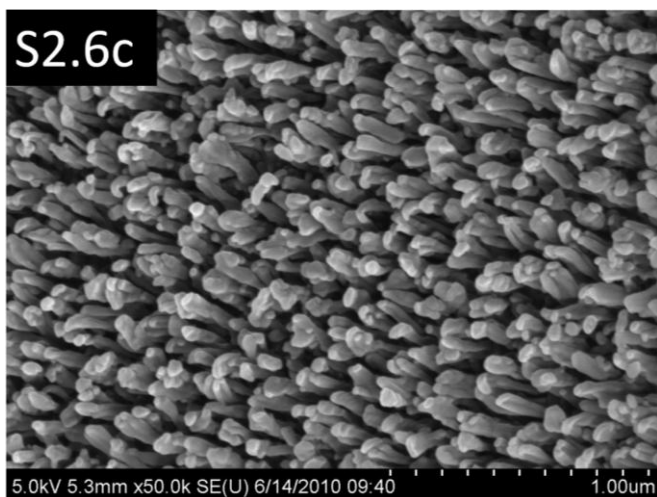

Supplement: c0jm03026k.pdf [file c0jm03026k.pdf]
